# Supplementary material for: Substance-P Inhibits Cardiac Microvascular Endothelial Dysfunction Caused by High Glucose-Induced Oxidative Stress
Source: Antioxidants (Basel). 2021 Jul 5;10(7):1084. doi: 10.3390/antiox10071084 (PMC8301094; doi:10.3390/antiox10071084)
Supplement: Supplementary file 1 [file antioxidants-10-01084-s001.zip › antioxidants-1278194-supplementary.pdf]

|                           |                  |                  |                         |                  |                  |
|---------------------------|------------------|------------------|-------------------------|------------------|------------------|
| Activin A                 | FGF-7/KGF        | PD-ECGF          | ADAMTS-1                | GDNF             | PDGF-AA          |
| Angiogenin                | GM-CSF           | PDGF-AB/PDGF-BB  | Angiopoietin-1          | HB-EGF           | Persephin        |
| Angiopoietin-2            | HGF              | CXCL/PF4         | Angiostatin/Plasminogen | IGFBP-1          | PIGF             |
| Amphiregulin              | IGFBP-2          | Prolactin        | Artemin                 | IGFBP-3          | Serpin B5/Maspin |
| Tissue Factor/Factor III  | IL-1 beta        | Serpin E1/PAI-1  | CXCL16                  | CXCL8/IL-8       | Serpin F1/PEDF   |
| DPPIV/CD26                | LAP (TGF-beta 1) | TIMP-1           | EGF                     | Leptin           | TIMP-4           |
| EG-VEGF                   | CCL2/MCP-1       | Thrombospondin-1 | Endoglin/CD105          | CCL3/MIP-1 alpha | Thrombospondin-2 |
| Endostatin/Collagen XVIII | MMP-8            | uPA              | Endothelin-1            | MMP-9            | Vasohibin        |
| FGF acidic                | NRG1-beta 1      | VEGF             | FGF basic               | Pentraxin 3      | VEGF-C           |
| FGF-4                     |                  |                  |                         |                  |                  |

**Figure S1.** The list of cytokine tested in cytokine array.

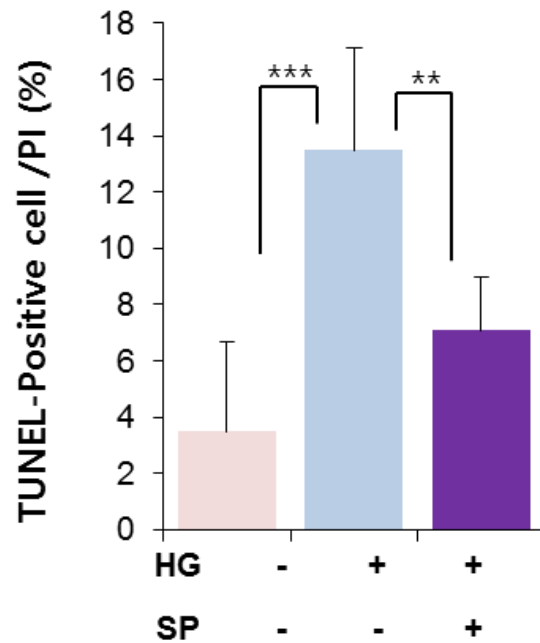

**Figure S2. The effect of SP on cell apoptosis under HG.** CMEC was exposed to HG for 8h, followed by SP treatment. At 24h post HG treatment, cell was fixed and stained for apoptotic cell using in situ cell death detection kit. Total cell was stained with Propidium iodide (PI) and TUNEL (+) cells were expressed as a percentage of PI-stained cells.

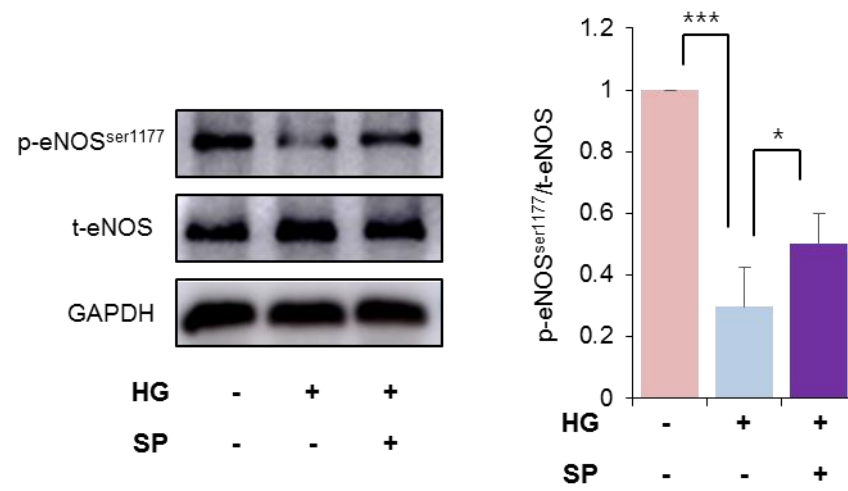

**Figure S3.** The analysis for eNOS expression in CMEC under HG. CMEC was exposed to HG for 8h, followed by SP treatment. At 24h post HG treatment, cell lysate was prepared and phosphorylated eNOS and total eNOS were analyzed by western blot.
